# Identification of *Trypanosoma brucei* RMI1/BLAP75 Homologue and Its Roles in Antigenic Variation

Hee-Sook Kim, George A. M. Cross\*

Laboratory of Molecular Parasitology, The Rockefeller University, New York, New York, United States of America

## Abstract

At any time, each cell of the protozoan parasite *Trypanosoma brucei* expresses a single species of its major antigenic protein, the variant surface glycoprotein (VSG), from a repertoire of >2,000 VSG genes and pseudogenes. The potential to express different VSGs by transcription and recombination allows the parasite to escape the antibody-mediated host immune response, a mechanism known as antigenic variation. The active VSG is transcribed from a sub-telomeric polycistronic unit called the expression site (ES), whose promoter is 40–60 kb upstream of the VSG. While the mechanisms that initiate recombination remain unclear, the resolution phase of these reactions results in the recombinational replacement of the expressed VSG with a donor from one of three distinct chromosomal locations; sub-telomeric loci on the 11 essential chromosomes, on minichromosomes, or at telomere-distal loci. Depending on the type of recombinational replacement (single or double crossover, duplicative gene conversion, etc), several DNA-repair pathways have been thought to play a role. Here we show that VSG recombination relies on at least two distinct DNA-repair pathways, one of which requires RMI1-TOPO3 $\alpha$  to suppress recombination and one that is dependent on RAD51 and RMI1. These genetic interactions suggest that both RAD51-dependent and RAD51-independent recombination pathways operate in antigenic switching and that trypanosomes differentially utilize recombination factors for VSG switching, depending on currently unknown parameters within the ES.

**Citation:** Kim H-S, Cross GAM (2011) Identification of *Trypanosoma brucei* RMI1/BLAP75 Homologue and Its Roles in Antigenic Variation. PLoS ONE 6(9): e25313. doi:10.1371/journal.pone.0025313

**Editor:** Najib M. El-Sayed, The University of Maryland, United States of America

**Received:** June 21, 2011; **Accepted:** August 31, 2011; **Published:** September 28, 2011

**Copyright:** © 2011 Kim, Cross. This is an open-access article distributed under the terms of the Creative Commons Attribution License, which permits unrestricted use, distribution, and reproduction in any medium, provided the original author and source are credited.

**Funding:** This work was supported by a Rockefeller University Women in Science fellowship to HK and by grant no. R01AI021729 from the National Institute of Allergy and Infectious Diseases (NIAID) of the U.S. National Institutes of Health (NIH). The content is solely the responsibility of the authors and does not necessarily represent the official views of the NIAID or the NIH. The funders had no role in study design, data collection and analysis, decision to publish, or preparation of the manuscript.

**Competing Interests:** The authors have declared that no competing interests exist.

\* E-mail: george.cross@rockefeller.edu

## Introduction

Monoallelic expression of multigene families occurs in a variety of cellular processes, including mating-type switching in yeasts, immunoglobulin gene diversification in B-cell development, odorant receptors, and surface antigen variation in several pathogens [1–7]. *Trypanosoma brucei* is a protozoan pathogen that causes African sleeping sickness. Only one allele of the variant surface glycoprotein (VSG) is expressed at a time in each trypanosome, yet the genome may contain more than 2,000 VSG genes and pseudogenes. About 15 sub-telomeric polycistronic expression sites (ES) contain a VSG ~ 50 kb downstream of their promoters [8–10] and about 1 kb upstream of the telomeric repeat array. Only one ES can transcribe a VSG at any time and the rest are transcriptionally silent. Most VSGs are not associated with an ES (minichromosomal and ‘telomere-distal’, also referred to as ‘chromosome-internal’), and they lack promoters. Antigenic switching is caused mainly by switching the expressed VSG through DNA recombination. Infrequently, a new VSG can be activated by switching the transcriptional status among the active and silent ES (reviewed in [4,11,12]). Recombination-mediated VSG switching occurs preferentially by gene conversion (GC) rather than crossover [13–16], despite the fact that there are no clear advantages in switching through GC *in vivo*.

One of the major factors that control mitotic crossover is the RTR complex (also known as the BTB complex). This complex

consists of a RecQ-family helicase (BLM in mammals and SGS1 in budding yeast), a Topoisomerase III  $\alpha$ , and RMI1/2 (BLAP75/18 in mammals and RMI1 in budding yeast). RMI is the third component that has been recently identified in several organisms [17–23]. The functions of the RTR complex have been documented extensively in yeasts and mammalian systems [21,22,24–31]. The complex safeguards genome integrity by influencing various aspects, including DNA replication, mitotic and meiotic recombination, and telomere dynamics. One of major functions of the RTR complex is to remove recombination intermediates that may accumulate during these processes. Genetic studies from budding yeast showed that the growth defect of *top3* is caused by the accumulation of recombination intermediates and the defect could be relieved by mutations in *SGS1* or in the *RAD51*-pathway [28,32,33]. Recombination intermediates accumulated when TOP3 enzyme activity was compromised [34]. A Holliday Junction (HJ) is structurally similar to a recombination intermediate, and the RTR complex is required for the removal of both structures. *In vitro* studies showed that human RMI1 (hRMI1) stimulates the double Holliday Junction (dHJ) dissolution activity of TOPO3 $\alpha$  and the dHJ unwinding activity of BLM-TOPO3 $\alpha$  [35,36]. In yeast, RMI1 stimulates the ssDNA binding and relaxation activity of TOP3 *in vitro* [37]. hRMI1 interaction with TOPO3 $\alpha$  appears to control TOPO3 $\alpha$  enzyme activity, as hRMI1 mutants defective for

interaction with TOPO3 $\alpha$ , not for DNA, lose the ability to stimulate the dHJ dissolution activity of TOPO3 $\alpha$  *in vitro* [38].

We showed previously that trypanosomes lacking TOPO3 $\alpha$  significantly increased *VSG* switching and this increase was largely due to the elevated levels of *VSG* GC and *VSG* crossover [39]. The data suggested that the RTR complex is probably conserved in *T. brucei* and may play roles in *VSG* switching by controlling undesirable recombination intermediates arising between the active *VSG* and silent *VSG* donors. Here we identify the *T. brucei* RMI1 homologue and demonstrate that TbRMI1 interacts with TbTOPO3 $\alpha$  and promotes productive *VSG* switching. We show that, similarly to the previously described TOPO3 $\alpha$  defect, RMI1 deficiency increases *VSG* switching rate by promoting *VSG* gene

conversion and crossover. Genetic interactions between *TbRMI1* and *TbRAD51* further reveal that antigenic variation is under control of multiple recombination pathways, depending on where the recombination occurs, and that *VSG* GC and ES GC are likely to be initiated by different triggers.

**Results**

**Deletion of Tb927.3.1830, a *T. brucei* DUF1767 domain-containing protein, causes a growth defect**

We demonstrated previously that *T. brucei* TOPO3 $\alpha$  plays critical roles in recombination-mediated *VSG* switching [39]. RMI1 homologues that work together with TOPO3 $\alpha$ -BLM

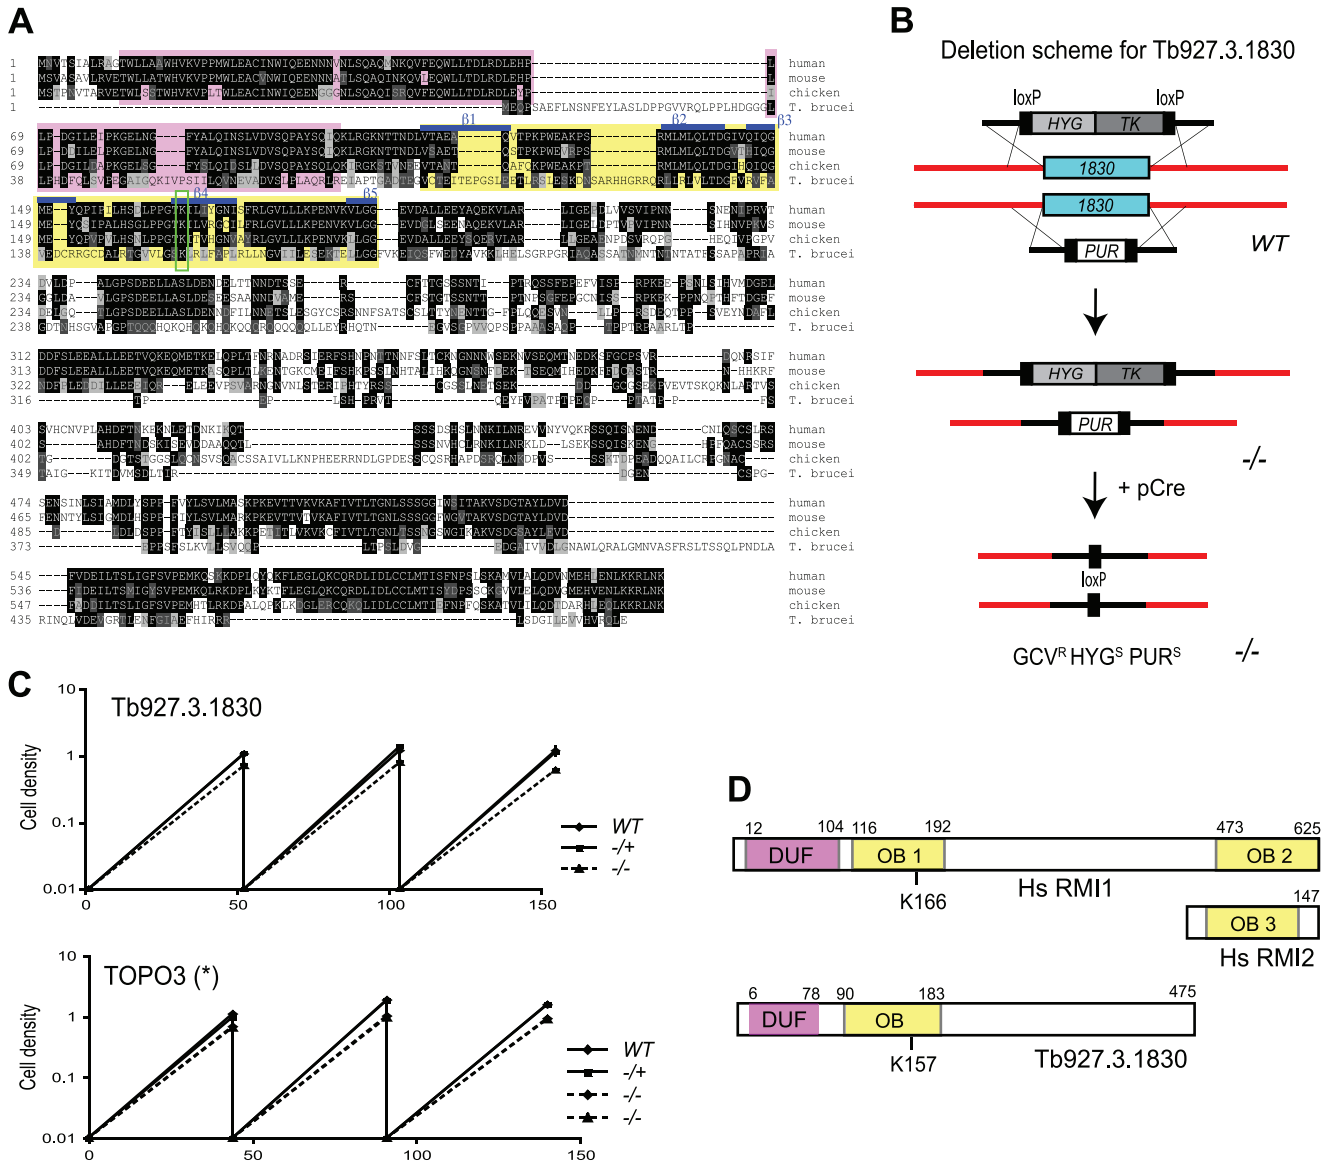

**Figure 1. Deletion of Tb927.3.1830 causes a growth defect.** (A) Alignment of Tb927.3.1830 with human, mouse and chicken RMI1. DUF1767 and OB-fold domains are indicated in pink and yellow boxes, respectively. Conserved lysine residues are in green box in the OB1 domain. Blue bars show locations of five  $\beta$ -strands of OB1. (B) Deletion scheme for Tb927.3.1830. The entire open reading frames (ORFs) of Tb927.3.1830 were sequentially deleted using cassettes containing *HYG-TK* or *PUR* flanked by loxP sites. The markers were removed by transient expression of Cre-recombinase [39,64]. (C) *Tb927.3.1830* exhibits a minor growth defect, similar to *Tbtopo3 $\alpha$* . Wild-type, *rmi1*<sup>-/+</sup> and *rmi1*<sup>-/-</sup> cells were diluted to 10,000 cells/ml and cells were counted after two days of incubation. This was repeated twice. Growth phenotypes of *Tbtopo3 $\alpha$*  mutants were taken from the previous study [39]. Error bars are shown, but are small. (D) Diagrams of human RMI1/2 [41] and Tb927.3.1830. doi:10.1371/journal.pone.0025313.g001

(TOP3-SGS1 in budding yeast) have recently been identified in several model organisms [18–20,23,30]. RMI1 homologues share a signature domain at the N-terminus, called DUF1767, whose function is unknown. By BLAST searches, we found two *T. brucei* proteins that contain a DUF1767 domain at the N-terminus, Tb927.3.1830 and Tb927.8.2040.

Figure 1A shows sequence alignment of Tb927.3.1830 with human, mouse, and chicken RMI1 homologues. RMI1 proteins possess an ‘oligonucleotide and oligosaccharide binding’ (OB)-fold (yellow box) next to the DUF1767 domain (pink box). In higher eukaryotes, RMI1 contains another OB-fold domain (OB2) in the C-terminus and associates with RMI2 (BLAP18) via the interaction between OB2 of RMI1 and OB3 of RMI2 [21,22]. RMI1 deletion mimics TOP3 or TOPO3 $\alpha$  deficiency in other organisms. Yeast *mil* mutant showed growth defects, similar to *top3* mutants [19,23]. *Tbtopo3 $\alpha$*  exhibited a minor growth defect [39]. To determine whether trypanosomes lacking any of these potential RMI1 homologues phenocopy *Tbtopo3 $\alpha$* 's growth defect, we constructed mutants lacking Tb927.3.1830 (Figure 1B) or Tb927.8.2040. Wild type, heterozygous and homozygous mutants were examined for cell growth. Deletion of Tb927.3.1830 mimicked *Tbtopo3 $\alpha$* , exhibiting a minor growth defect (Figure 1C), while Tb927.8.2040 deletion grew normally (data not shown), indicating that Tb927.3.1830 could be a RMI1 homologue but Tb927.8.2040 is probably not. Similar to *Tbtopo3 $\alpha$*  mutant [39], Tb927.3.1830 deletion shows sensitivity to hydroxyurea, a drug that blocks replication (data not shown).

Human RMI core complex contains three OB domains, N-terminal OB1 and C-terminal OB2 in RMI1, and OB3 in RMI2 (Figure 1D). The OB1 of hRMI1 interacts with TOPO3 $\alpha$ -BLM to form the BTB complex and the OB2 with OB3 of RMI2 to form the RMI subcomplex [22,40]. X-ray crystal structure studies have shown that the RMI core complex interaction is essential for its *in vivo* function [40,41]. The OB1 domain is essential for stimulation of the dHJ dissolution activity of the BLM-TOPO3 $\alpha$  [40]. K166 (green box in Figure 1A) appears to be important for the stability of OB1 structure of hRMI1 [40]. *mil-K166A* mutant is unable to interact with TOPO3 $\alpha$  and defective in stimulating the dissolution activity of BLM-TOPO3 $\alpha$  [38]. This lysine residue seems to be conserved in *T. brucei* Tb927.3.1830 (K157 in green box in Figure 1A). But Tb927.3.1830 appears to lack OB2 domain and it is unknown whether there are multiple RMI proteins present in *T. brucei*.

### Tb927.3.1830 interacts with TbTOPO3 $\alpha$

To confirm whether Tb927.3.1830 is a *T. brucei* RMI1 homologue, we performed co-immunoprecipitation experiments in cells expressing endogenous copies of Tb927.3.1830-3xHA or Tb927.8.2040-3xHA, and/or TOPO3 $\alpha$ -3xMYC, each tagged at the C-terminus, using a PCR method [42]. The functionalities of TOPO3 $\alpha$ -3xMYC and Tb927.3.1830-3xHA were confirmed by complementation of growth defects (data not shown). The functionality of Tb927.8.2040-3xHA could not be assessed as the mutant showed no phenotype but the tagging was made in a Tb927.8.2040 heterozygote and these grew normally. Lysates were prepared and immunoprecipitated with either anti-HA or anti-MYC antibodies. Precipitated proteins were analyzed by western blot. TOPO3 $\alpha$ -3xMYC was pulled down only in Tb927.3.1830-3xHA immunoprecipitates, but not in Tb927.8.2040-3xHA (Figure 2A, red box). Consistent with this, TOPO3 $\alpha$ -MYC coimmunoprecipitated with Tb927.3.1830, but not Tb927.8.2040 (Figure 2B, red box). These data confirm that Tb927.3.1830 is a RMI1 homologue, so Tb927.3.1830 will be referred to as TbRMI1 henceforth.

### TbRMI1 deficiency increases VSG switching frequency

Deletion of *TbTOPO3 $\alpha$*  caused significant increase (10–40-fold) in VSG switching frequency [39]. Switching frequency should increase in the absence of TbRMI1, if TbRMI1 works together with TbTOPO3 $\alpha$  in antigenic switching. We measured the VSG switching frequency in *Tbmi1* null mutant, using the assay developed previously [39]. The active expression site, ES1-VSG 427-2 (VSG 221), was doubly marked with a blasticidin-resistance gene (*BSD*) and a *PUR-TK*, immediately downstream of the promoter and at the 3' end of the 70-bp repeats, respectively (Figure 3A). VSG switching concurs with the loss or transcriptional repression of *PUR-TK* marker, so switched variants can be counter-selected in media containing ganciclovir (GCV), a nucleoside analogue that kills *TK*-expressing cells.

Wild type and *mi1* strains were grown in media containing blasticidin and puromycin to maintain the homogeneity of the expressed VSG. The cells were then allowed to switch in the absence of selection for 3 days.  $5 \times 10^5$  or  $1 \times 10^6$  cells were suspended in media containing 5  $\mu$ g/ml GCV and distributed in 96-well plates. Genuine switchers will be sensitive to puromycin. GCV-resistant clones that were not switched but carried mutations in *TK* were ruled out by examining puromycin sensitivity. *GCV<sup>R</sup> PUR<sup>S</sup>* clones that were not switched and carried mutation(s) in *PUR-TK* should still express VSG 427-2. These were excluded by western blot using antibody against VSG 427-2. Five and three independent cultures from wild-type and *mi1* mutants, respectively, were examined and

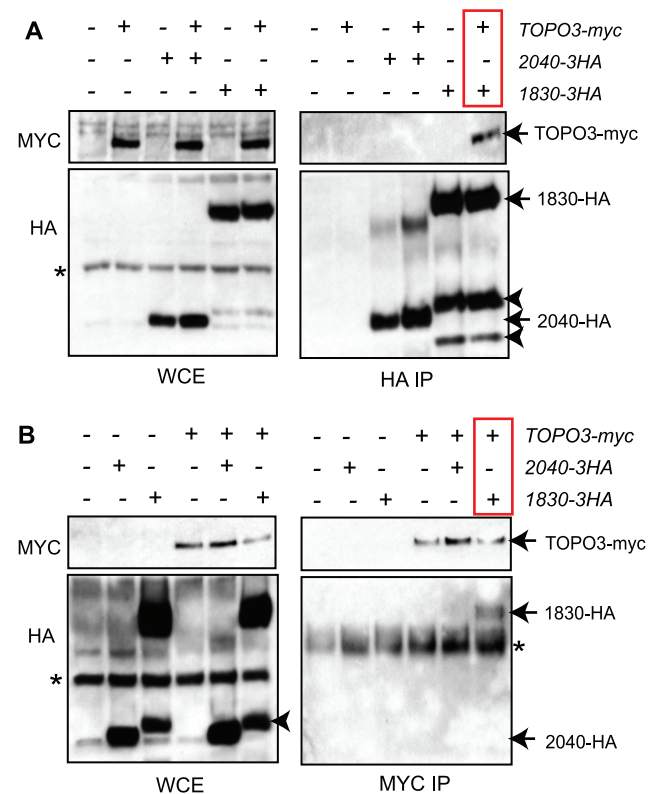

**Figure 2. Tb927.3.1830 interacts with TbTOPO3 $\alpha$ .** (A) Tb927.3.1830-HA co-immunoprecipitates with TOPO3 $\alpha$ -MYC. (B) TOPO3 $\alpha$ -MYC co-immunoprecipitates with Tb927.3.1830-HA. TOPO3 $\alpha$  was endogenously tagged with 3xMYC, and Tb927.8.2040 and Tb927.3.1830 with 3xHA. Cell lysates were immunoprecipitated either with anti-HA or anti-MYC antibodies and analyzed by western blot. (\*) and (\*\*) indicate antibody heavy and light chains. Arrow heads indicate break-down products of 1830-HA.

doi:10.1371/journal.pone.0025313.g002

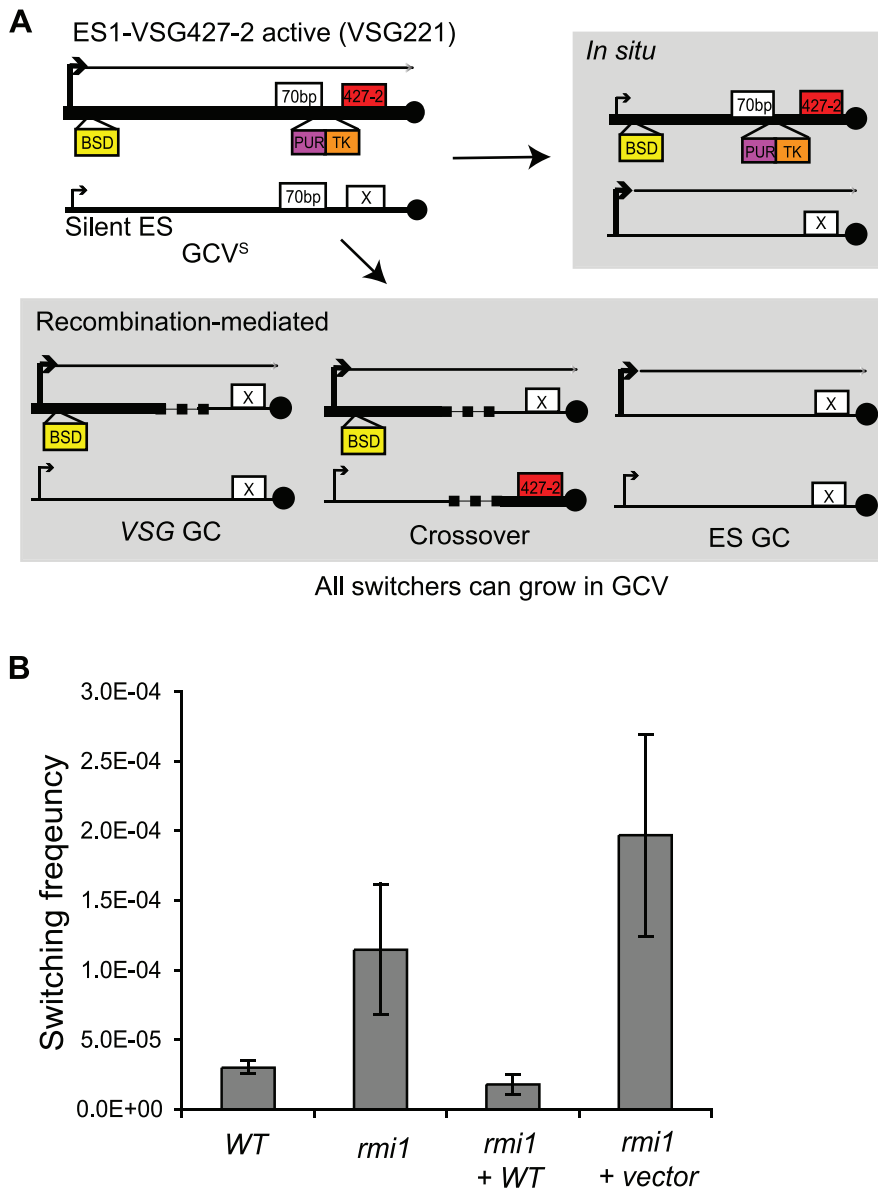

**Figure 3. TbRMI1 deficiency increases VSG switching frequency.** (A) VSG switching reporter cell line and switching mechanisms. The active expression site, ES1-VSG 427-2, was doubly marked with *BSD* at the promoter and *PUR-TK* immediately at the 3' end of the 70-bp repeats. VSG switching events will accompany either loss or repression of the *PUR-TK* marker, which allows only the switchers to grow in the presence of GCV [39]. Non-switchers can be eliminated as described in the text. Black circles are telomere repeats. (B) TbRMI1 deficiency increases VSG switching frequency. Switching frequency was measured in wild type, *rmi1*, and *rmi1* cells transfected either with an empty vector or the wild-type *RMI1*. doi:10.1371/journal.pone.0025313.g003

the ratio of  $GCV^R$  switchers to the total number of cells plated was plotted in Figure 3B. The results are also summarized in Table 1. Switching frequency increased  $\sim 4$  fold in *rmi1* ( $11.0 \pm 3.4 \times 10^{-5}$ ), compared to wild type ( $2.8 \pm 0.5 \times 10^{-5}$ ). To confirm that the switching phenotype was caused by the absence of *RMI1*, an empty vector or a vector containing wild type *RMI1* were introduced into the *rmi1* null mutant, and three independent clones from each transfection were examined for VSG switching frequency. As shown in Figure 3B, reintroduction of wild-type *RMI1* complemented the increased-switching phenotype of *rmi1* ( $1.8 \pm 0.7 \times 10^{-5}$ ), while empty-vector transfected *rmi1* cells still switched at a higher frequency ( $20.0 \pm 7.2 \times 10^{-5}$ ), indicating that increased-switching phenotype was due to *RMI1* deficiency.

### TbRMI1 monitors VSG recombination, similarly to TbTOPO3 $\alpha$

Hyper-recombination and elevated crossover are prominent phenotypes caused by *TOPO3 $\alpha$*  deficiency in *T. brucei* [39] and in other organisms [26,30,31,43,44]. To determine whether TbRMI1 is required to suppress VSG GC and crossover, 275 cloned switchers (112 from five wild type cultures and 163 from three *rmi1* cultures) were examined. The diagram in Figure 3A illustrates four major switching mechanisms characterized. Each event can be distinguished by assessing blasticidin sensitivity, and *BSD* and VSG 427-2 presence by PCR. As summarized in Figure 4 and Table 1, VSG GC and crossover rates increased  $\sim 13$ - and  $\sim 14$ -fold in the absence of *RMI1*, compared to wild type.

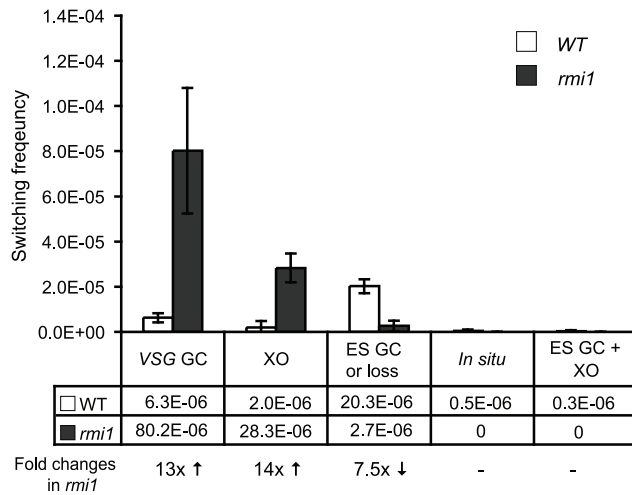

**Figure 4. TbRMI1 monitors VSG recombination.** TbRMI1 deficiency increases VSG GC and crossover (XO) but decreases ES GC. 275 cloned switchers were examined and the frequency of each switching mechanism was plotted. White bars are wild type and dark grey bars are *rmi1* mutant. Error bars indicate standard deviation. The results are also summarized in Table 1. Switched variants were assigned as follows (Figure 3A diagram); VSG-GC switchers, *BSD*<sup>+</sup> VSG 427-2<sup>-</sup>; 'ES GC or ES loss' switchers, *BSD*<sup>-</sup> VSG 427-2<sup>+</sup>; crossover switchers, *BSD*<sup>+</sup> VSG 427-2<sup>+</sup>; *in situ*, *BSD*<sup>+</sup> VSG 427-2<sup>+</sup>. doi:10.1371/journal.pone.0025313.g004

In our assay, switchers that arose by ES GC and ES loss cannot be distinguished, because these switchers will be negative for *BSD* and VSG 427-2 when examined by PCR [39]. Frequent loss of entire active ES was observed when *TK* was targeted next to the active ES promoter [45]. Therefore, *BSD*<sup>-</sup> VSG 427-2<sup>+</sup> switchers should represent either ES GC or ES loss (could be associated with multiple events). Deletion of *RMI1* decreased the rate of 'ES GC or ES loss', indicating that RMI1 is required for ES GC, a gene

conversion event that could span ~50 kb. Collectively, we conclude that RMI1 also controls the outcome of recombinational switching near VSGs, similarly to TOPO3 $\alpha$ , and that RMI1 functions together with TOPO3 $\alpha$  in *T. brucei* antigenic variation. Our data suggest that the RMI1-TOPO3 $\alpha$  pathway has two distinct effects on VSG switching, suppressing recombination near the VSG but promoting recombination near the ES promoter.

#### Genetic interaction between *TbRMI1* and *TbTOPO3 $\alpha$*

Although *TbRMI1* interacts with *TbTOPO3 $\alpha$*  and the *rmi1* null mutation caused similar outcomes of VSG switching as the *topo3 $\alpha$* , RMI1 deficiency increased VSG switching frequency by only ~4-fold, which is less than previously reported for TOPO3 $\alpha$  deficiency [39]. If TOPO3 $\alpha$ -RMI1 works in the same pathway, the *rmi1 topo3 $\alpha$*  double mutant should exhibit the same phenotype as one of the single mutants. If *rmi1 topo3 $\alpha$*  exhibits an additive phenotype, it is possible that they play additional separate roles. To determine the genetic relationship between RMI1 and TOPO3 $\alpha$ , we compared the switching frequencies of wild type, *rmi1*, *topo3 $\alpha$*  and *rmi1 topo3 $\alpha$*  double mutant. Switching was significantly increased in the *topo3 $\alpha$*  single mutant ( $53.2 \pm 23.1 \times 10^{-5}$ ), ~10–30-fold higher than wild type ( $2.8 \pm 0.5 \times 10^{-5}$ ), and this was ~5-fold higher than *Tbrmi1* ( $11.0 \pm 3.4 \times 10^{-5}$ ) (Figure 5A). The double mutant behaved more like *rmi1* single mutant, exhibiting only ~2–3-fold increase ( $6.5 \pm 1.3 \times 10^{-5}$ ) relative to wild type, suggesting that RMI1 is epistatic to TOPO3 $\alpha$  in antigenic switching. In the *rmi1 topo3 $\alpha$*  double mutant, as summarized in Table 1, VSG switching also occurred mainly by VSG GC and crossover.

Next, we examined whether *Tbrmi1* causes hyper-recombination elsewhere and whether RMI1 is also epistatic to TOPO3 $\alpha$  in this context. Previously, by replacing one allele of *TbURA3* with *HYG-TK*, we devised a recombination assay [39] in which GC at a non-ES locus can be measured using two counter-selecting drugs: GCV that kills *TK*<sup>+</sup> cells and 5-FOA that kills *URA3*<sup>+</sup>. The frequency of *GCV*<sup>R</sup> and *FOA*<sup>R</sup> represents the GC rate at the *URA3* locus. Using this assay, GC increased by 5.9-fold in the absence of

**Table 1. VSG-switching events in wild type, *rmi1*, *rad51*, *rmi1 rad51*, and *rmi1 topo3 $\alpha$*  cultures.**

| Genotype                             | Total # cells plated | Number of switchers |        |    |                 |         |       |
|--------------------------------------|----------------------|---------------------|--------|----|-----------------|---------|-------|
|                                      |                      | Total               | VSG GC | XO | 'ES GC or loss' | In situ | ES+XO |
| WT                                   | 500,000              | 17                  | 3      | 3  | 11              | 0       | 0     |
| WT                                   | 500,000              | 11                  | 5      | 0  | 6               | 0       | 0     |
| WT                                   | 1,000,000            | 26                  | 4      | 0  | 20              | 1       | 1     |
| WT                                   | 1,000,000            | 26                  | 9      | 0  | 16              | 1       | 0     |
| WT                                   | 1,000,000            | 31                  | 6      | 2  | 23              | 0       | 0     |
| <i>rmi1</i>                          | 500,000              | 74                  | 56     | 16 | 2               | 0       | 0     |
| <i>rmi1</i>                          | 478,000              | 39                  | 29     | 10 | 0               | 0       | 0     |
| <i>rmi1</i>                          | 500,000              | 50                  | 34     | 14 | 2               | 0       | 0     |
| <i>rad51</i>                         | 2,000,000            | 39                  | 30     | 4  | 2               | 3       | 0     |
| <i>rad51</i>                         | 2,000,000            | 26                  | 9      | 4  | 1               | 9       | 3     |
| <i>rad51</i>                         | 2,000,000            | 10                  | 7      | 1  | 1               | 0       | 1     |
| <i>rmi1 rad51</i>                    | 2,000,000            | 4                   | 0      | 2  | 1               | 1       | 0     |
| <i>rmi1 rad51</i>                    | 2,000,000            | 2                   | 0      | 1  | 0               | 1       | 0     |
| <i>rmi1 rad51</i>                    | 2,000,000            | 3                   | 2      | 1  | 0               | 0       | 0     |
| <i>rmi1 topo3<math>\alpha</math></i> | 500,000              | 28                  | 22     | 6  | 0               | 0       | 0     |
| <i>rmi1 topo3<math>\alpha</math></i> | 500,000              | 37                  | 21     | 13 | 2               | 0       | 1     |

doi:10.1371/journal.pone.0025313.t001

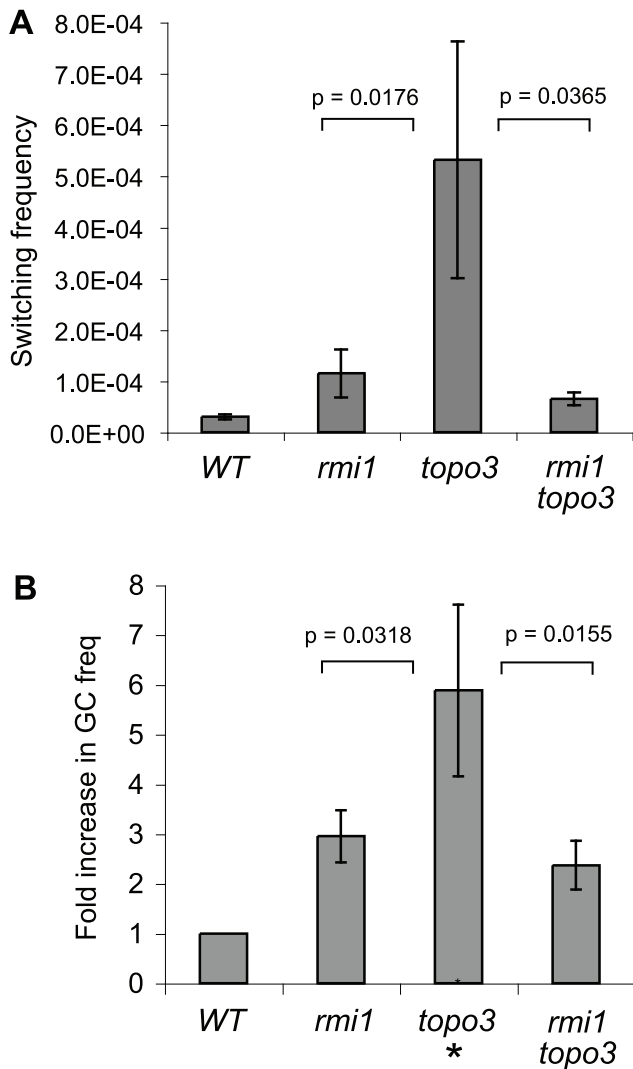

**Figure 5. Genetic interaction between *T. brucei* RMI1 and *TOPO3α*.** (A) *TbRMI1* is epistatic to *TbTOPO3α* in *VSG* switching. (B) *RMI1* absence increases gene-conversion frequency at *URA3* locus and *TbRMI1* is epistatic to *TbTOPO3α* in gene conversion at this locus. Two counter-selectable markers, *TK* and *URA3*, were used to measure the GC rates [39]. *GCV<sup>R</sup>* and *FOA<sup>R</sup>* clones were counted and fold increase relative to wild type was plotted. Error bars indicate standard deviation. (\*) in Figure 5B indicates *topo3α* data taken from the previous report [39]. Unpaired T tests were done and means of switching and GC frequencies were significantly different in the mutants. doi:10.1371/journal.pone.0025313.g005

*TOPO3α* [39]. One allele of *URA3* was replaced with *HYG-TK* in wild type, *rmi1* or *rmi1 topo3α* strains. Three independent *HYG<sup>R</sup>* clones each were examined and fold increase relative to wild type was plotted (Figure 5B). *RMI1* deficiency increased GC rate (2.9-fold), and the double mutant behaved more like *rmi1* single mutant, exhibiting 2.4-fold increase of GC. The data show that *RMI1* is epistatic to *TOPO3α* in gene conversion at the *URA3* locus and in *VSG* switching.

#### TbRMI1 is required for both RAD51-dependent and RAD51-independent *VSG* switching

The increased-switching phenotype of *Tbtopo3α* was dependent on *TbRAD51* [39]. Therefore, we asked whether RAD51 is

required for the increased switching observed in the *rmi1* mutant. Both alleles of *RAD51* were deleted in wild type and *rmi1* mutant. *rad51* single and *rmi1 rad51* double mutants were examined for *VSG* switching frequency and mechanisms.  $2 \times 10^6$  cells from three independent cultures of each mutant were plated, and cloned *GCV<sup>R</sup>* switchers were analyzed. Deletion of *RAD51* caused only 2-fold reduction in overall *VSG*-switching in the presence of *RMI1*. On the other hand, it caused ~19-fold reduction in the absence of *RMI1*, compared to wild type (Figure 6A and Table 1). This suggests that there are at least two recombination pathways working in antigenic switching mechanisms: *RAD51*-dependent and -independent.

75 and 10 cloned switchers were analyzed from *rad51* and *rmi1 rad51* mutants, respectively (Figure 6B, C, and D and Table 1). *VSG* GC was not affected in *rad51*, but it was significantly reduced in *rad51 rmi1* double mutants, indicating that at least two pathways are operating for *VSG* GC, one of which requires *RMI1* independently of *RAD51*. *RAD51* deletion eliminated the increased *VSG* GC and crossover phenotype of *rmi1*, suggesting that *RMI1* may be required to suppress *RAD51*-dependent recombinogenic structures arising between the active *VSG* and *VSG* donors, similar to the genetic interaction between *TOPO3α* and *RAD51*. Unlike *VSG* GC, 'ES GC or ES loss' was reduced in an *rmi1* or *rad51* single mutant, suggesting that *RAD51*-dependent recombinogenic structure may not be the cause of this switching mechanism. Therefore, recombination near ES promoter is fundamentally different from that near *VSG*. Collectively, we propose that *RMI1* is required to suppress *RAD51*-dependent recombination intermediates near *VSG*, but it is required to promote recombination near ES promoter.

#### Discussion

Extensive genetic and biochemical studies from yeasts have established the mechanisms of several key recombination pathways. These pathways serve multiple purposes, depending on cellular needs. Choice of recombination pathways determines cell fate. Failure to make the right choices can result in chromosome instability and/or in incompetence in responding to the environment, both eventually leading to high chance of lethality.

*T. brucei* expresses one type of *VSG* gene at a time, with the potential to express countless different *VSGs*. Switching to a different *VSG* allows parasites to escape a host's immune responses. As illustrated in Figure 3A, recombination-mediated *VSG* switching can be initiated near or downstream of the ES promoter. An entire silent ES or a relatively smaller region containing a silent *VSG* can be duplicated and transposed into the active ES to replace a previously active ES-associated *VSG*. This appears to occur through break-induced replication (BIR) [46], which is at least partly due to the 70-bp repeats that are present upstream of *VSG* genes, but limited homologies are present within and downstream of *VSG* genes. Telomere repeats may facilitate *VSG* switching, providing a second region of homology, but this possibility has not been extensively examined. How the recombination-mediated *VSG* switching occurs is still not clear.

Similar to mitotic recombination, crossover is relatively infrequent in recombination-mediated *VSG* switching [13-16,39]. The RTR complex is one of the major factors that control mitotic crossover in other organisms. The RTR complex consists of a *RecQ*-family helicase (*BLM/SGS1*), a *Topoisomerase III α*, and *RMI1/2 (BLAP75/18)* [17-23]. *In vitro* studies showed that human hRMI1 stimulates the dHJ dissolution activity of *TOPO3α* and the dHJ unwinding activity of *BLM-TOPO3α* [35,36].

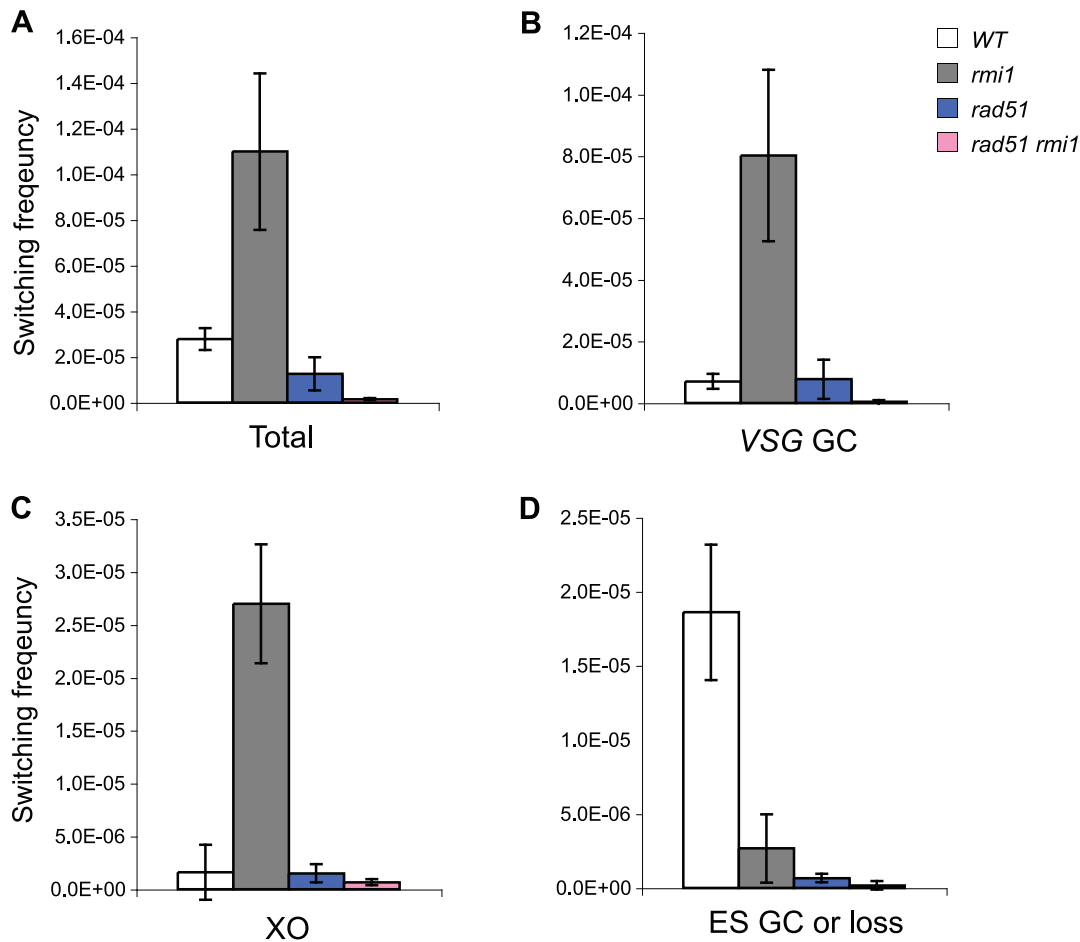

**Figure 6. TbRMI1 is required for both RAD51-dependent and RAD51-independent VSG switching.** (A) Simultaneous deletion of *RMI1* and *RAD51* severely impairs VSG switching. Overall VSG switching frequencies of wild type, *rmi1*, *rad51*, and *rmi1 rad51* were plotted. (B) Increased VSG GC rate in *rmi1* was dependent on RAD51, but RMI1 also functions in VSG GC switching independently of RAD51. (C) Increased crossover in *rmi1* was dependent on RAD51. (D) 'ES GC or ES loss' switching was impaired in a *rad51* or *rmi1* single mutant. The results are also summarized in Table 1. doi:10.1371/journal.pone.0025313.g006

We have previously shown that TOPO3 $\alpha$  deficiency is associated with hyper-recombination, consistent with studies in other organisms, and with hyper-VSG switching phenotypes in *T. brucei* [39]. TOPO3 $\alpha$  is required to suppress crossover VSG switching in *T. brucei*. In this study, we characterized a *T. brucei* RMI1 ortholog that physically interacts with TbTOPO3 $\alpha$ . Similar to TOPO3 $\alpha$ , deficiency of TbRMI1 increased the rate of VSG crossover, a hallmark of defects in RTR complex function. In addition, TbRMI1 deficiency increased VSG GC switching to a similar extent as TbTOPO3 $\alpha$  deficiency, which caused dramatic increase in VSG GC rate. VSG GC was around 70% in both wild type and *Tbtopo3 $\alpha$*  mutant, indicating that VSG GC frequency was 10-40 fold higher than wild type, as the overall VSG switching frequency was 10-40 fold higher in the *Tbtopo3 $\alpha$*  mutant [39]. One of major functions of the RTR complex is to control recombination intermediates accumulating during replication stress. Genetic studies from budding yeast demonstrated that the growth defect of *top3* is caused by the accumulation of recombination intermediates and that the defect could be relieved by mutations in *SGS1* and in the *RAD51*-pathway [28,32,33]. Recombination intermediates accumulated when TOP3 enzyme activity was compromised [34]. Our data from this study suggests that RMI1 works together with TOPO3 $\alpha$  during VSG switching. We propose that accumulation of recombination intermediates near the active VSG causes

hyper-VSG GC and hyper-crossover phenotypes when TOPO3 $\alpha$ -RMI1 function is compromised (Figure 7 and [39]).

What could cause recombination intermediates to accumulate in the active VSG locus? Genome-wide analysis of ORC1 association showed that ORC1 was enriched at subtelomeric regions (Kinoplastid Molecular Cell Biology meeting April 2011, Tiengwe CM et al.). Some of these ORC1 binding sites may initiate replication. VSGs are located close to telomere repeats. It was shown that the telomere repeats are fragile in mammalian cells, dependent on replication and telomere binding factor TRF1 [47]. In the absence of TRF1, telomere repeats break more frequently and replication was frequently initiated within the TTAGGG repeats, increasing telomere instability and sister-chromatid bridging. Interestingly, BLM and RTEL helicases were required to suppress the telomere fragility. Thus, it is possible that fragility of the active ES could be due to a combination of telomere instability and replication defects. In the absence of TOPO3 $\alpha$  or RMI1, these could cause the accumulation of recombination intermediates.

Due to lack of information on DNA replication in *T. brucei*, it is impossible to determine the identities of recombination intermediates that might accumulate in *topo3 $\alpha$*  or *rmi1* trypanosome mutants. Recombination intermediates could arise when replication forks encounter DNA damage, during replication progression

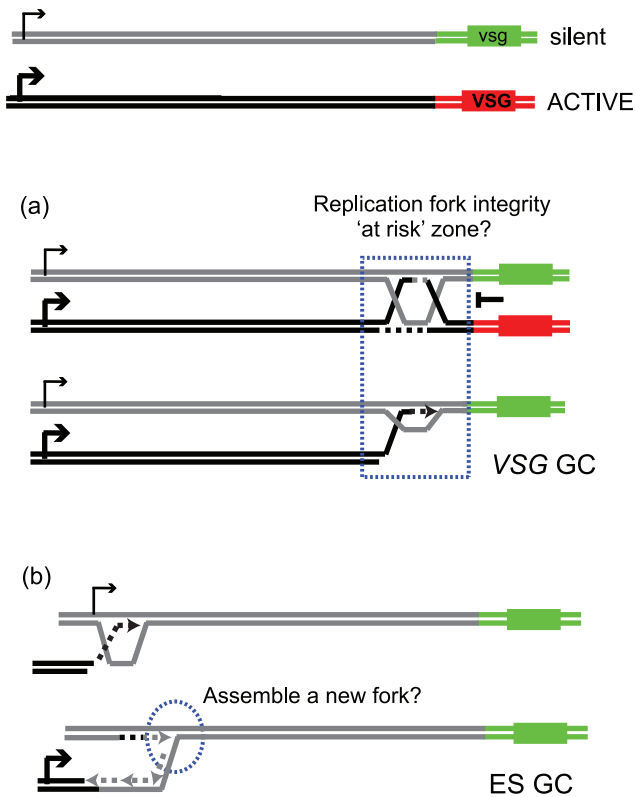

**Figure 7. Multiple genetic networks in recombination-mediated VSG variation.** The diagram shows the active ES (ES1) expressing VSG (red) and a silent ES containing *vsg* (green). RMI1 deficiency exhibited opposite phenotype in VSG-GC and ES GC switching, suggesting that molecular mechanisms of these events are distinct. We propose that there may be ‘replication fork instability zone(s)’ near VSG, potentially the 70-bp repeats, but not in ES promoter region. The RMI1-TOPO3 $\alpha$  is required to dissolve recombination intermediates arising in this zone during replication. When their function is compromised, recombination intermediates accumulate and result in VSG-GC and crossover switches (a). RMI1 is required to promote ES GC. As ES GC requires extension of much longer regions compared to VSG GC, having a stable replication fork must be advantageous than having a migrating D-loop. Budding yeast SGS1 is required for replisome stability. Therefore, we propose that *T. brucei* RMI1-TOPO3 $\alpha$  might stabilize a newly assembled replication fork between the active and a silent ES near promoter region. Formation of a stable replication fork may be the key step to generate ES GC switching (b). doi:10.1371/journal.pone.0025313.g007

and repair. Intermediates could form between sister-chromatids with entangled regions, called hemicatenanes, which can be processed to ‘rec-X’ structures, whose resolution requires SGS1-TOP3 in budding yeast [34,48,49]. These structures are different in regard to base pairing and presence of single stranded regions and they can be visualized by DNA 2D gel analysis by Southern blot, a technique unavailable in *T. brucei*. We showed that VSG GC and crossover are suppressed by TOPO3 $\alpha$  and RMI1 in a RAD51-dependent manner. Therefore, we think that TOPO3 $\alpha$ -RMI1 may play roles in maintaining ES integrity near VSGs by removing these ‘unwanted’ recombination intermediates. Without TOPO3 $\alpha$ -RMI1, they might be resolved by other nucleases (crossover), or a silent VSG locus might be used as a new template during hemicatenane-mediated template switching using its homology sequences and complete replication (VSG GC). It is possible that TOPO3 $\alpha$ -RMI1 deficiency could be associated with location specific VSG switching phenotypes due to replication

stability ‘at risk’ zone(s) near VSG genes. In the normal situation, TOPO3 $\alpha$ -RMI1 may be responsible for protecting the integrity of that region(s) (Figure 7(a)).

When double strand breaks (DSBs) occur, broken DNA ends are resected, leaving a 3’ overhang, and a RAD51 filament on single stranded DNA invades a template strand to form a D-loop. How this structure is processed can decide how the breaks are repaired. End resection requires SGS1-DNA2-RPA, and EXO1, and SAE2-MRE11 complex and the end resection activity of SGS1 is stimulated by TOP3-RMI1 in budding yeast [50,51]. BIR frequency increases 39-fold in *sgs1 $\Delta$  exo1 $\Delta$*  double mutants [52]. Interestingly, in combination with *exo1 $\Delta$* , BIR was increased in a separation-of-function allele of *SGS1*, *sgs1-D664A*, which is proficient for gene conversion but defective for resolution of recombinogenic X-structures formed by replication fork stalling [52,53]. The residue D664 is located at the second acidic region (AR2) in the N-terminus of SGS1 and the *sgs1-AR2A* shows similar phenotype as the *sgs1-D664A*. There are two recQ family helicases in *T. brucei*, Tb927.8.6690 and Tb927.6.3580, and Tb927.8.6690 appears to be a BLM/SGS1 ortholog. The region encompassing D664 of SGS1 seems to be conserved in Tb927.8.6690; YPWSD<sub>664</sub>E in SGS1 and YPWSE<sub>449</sub>E in Tb927.8.6690. Tb927.8.6690 and mutations at this particular region would be useful tools to study molecular mechanism of VSG switching more in detail in the future.

It is notable that VSG GC frequency decreased further in *mil rad51* double mutants compared to wild type, suggesting that there are pathways that require RMI1, independently of RAD51. Studies in yeasts and in *T. brucei* have shown that recombination still occurs in *rad51 $\Delta$*  cells [54-56]. In the absence of telomerase, telomeres are maintained by a RAD51-dependent and independent pathways [57-59]. It is possible that RMI1 may play distinct roles in VSG switching in a RAD51-independent manner.

The frequency of ‘ES GC or ES loss’ decreased in the absence of RMI1 or RAD51, unlike VSG GC, which was significantly increased in the absence of RMI1 and was not affected by RAD51. This is interesting but puzzling, considering that hyper-recombination is the hallmark phenotype of RMI1 deficiency. ‘ES GC or ES loss’ switching seems to occur in a RAD51 and/or RMI1 dependent manner, but their genetic relations cannot be deduced from the current data. However, it is clear that ES GC is not triggered by the same source as the VSG GC. Random breaks may occur at the active promoter due to high level of transcription and these breaks would normally be repaired by homologous recombination, using sister-chromatids, or by NHEJ. However, infrequently, template switching (to a silent ES promoter region) could occur and be repaired by BIR to generate ES GC switchers. When BIR was assayed in a budding yeast cell line with two template chromosomes available, template switching occurred about 20 percent of the time, usually near the sites of strand invasion [60]. The current hypothesis is that repair could be completed by D-loop migration coupled with lagging strand DNA synthesis moving along the template or strand invasion intermediates can be cleaved by endonuclease(s) [60,61]. This cleavage would allow a new replication fork to establish between two chromosomes (the active and a silent ES in the case of VSG switching). As ES GC switching requires duplication of much larger fragment (~ 50 kb) than the VSG GC (~ 4 kb), establishing a stable replication fork could be more advantageous than a migrating D-loop for ES GC, while it would not matter for VSG GC events that require duplication of shorter regions. The repair can be completed by a newly assembled replication fork between the active and silent ES, giving rise to an ES GC switcher (Figure 7 (b)).



**Table 2.** Strains used in this study.

| Names (sources)    | Genotypes                                               | Manipulations                                                                                            |
|--------------------|---------------------------------------------------------|----------------------------------------------------------------------------------------------------------|
| SM                 | WT                                                      | T7 RNA polymerase and Tet repressor (TetR):: NEO                                                         |
| HSTB-188 [39]      | WT                                                      | ES1 promoter::BSD                                                                                        |
| HSTB-261 [39]      | WT                                                      | ES1 promoter::BSD, 70-bp repeats-PUR-TK                                                                  |
| HSTB-229           | <i>rmi1</i> <sup>+/+</sup>                              | ES1 promoter::BSD, <i>rmi1</i> ΔloxP-HYG-TK-loxP/+                                                       |
| HSTB-286           | <i>rmi1</i> <sup>-/-</sup>                              | ES1 promoter::BSD, <i>rmi1</i> ΔloxP-HYG-TK-loxP/ΔloxP-PUR-loxP                                          |
| HSTB-298           | <i>rmi1</i> <sup>-/-</sup>                              | ES1 promoter::BSD, <i>rmi1</i> ΔloxP/ΔloxP                                                               |
| HSTB-336           | <i>rmi1</i> <sup>-/-</sup>                              | ES1 promoter::BSD, 70-bp repeats-PUR-TK, <i>rmi1</i> ΔloxP/ΔloxP                                         |
| HSTB-411, 412, 413 | <i>rmi1</i> <sup>-/-</sup> + Vector                     | ES1 promoter::BSD, 70-bp repeats-PUR-TK, <i>rmi1</i> ΔloxP/ΔloxP + pHD309 (empty vector)                 |
| HSTB-414, 415, 416 | <i>rmi1</i> <sup>-/-</sup> + RMI1-wt                    | ES1 promoter::BSD, 70-bp repeats-PUR-TK, <i>rmi1</i> ΔloxP/ΔloxP + pSY38 (RMI1-wt in pHD309)             |
| HSTB-344 [39]      | <i>topo3α</i> <sup>-/-</sup>                            | ES1 promoter::BSD, 70-bp repeats-PUR-TK, <i>topo3α</i> ΔloxP/ΔloxP                                       |
| HSTB-365 [39]      | <i>rad51</i> <sup>-/-</sup>                             | ES1 promoter::BSD, 70-bp repeats-PUR-TK, <i>rad51</i> ΔHYG/ <i>rad51</i> ΔPHELO                          |
| HSTB-384, 385, 386 | <i>rmi1</i> <sup>-/-</sup> <i>rad51</i> <sup>-/-</sup>  | ES1 promoter::BSD, 70-bp repeats-PUR-TK, <i>rmi1</i> ΔloxP/ΔloxP, <i>rad51</i> ΔHYG/ <i>rad51</i> ΔPHELO |
| HSTB-456           | <i>rmi1</i> <sup>-/-</sup> <i>topo3α</i> <sup>-/-</sup> | ES1 promoter::BSD, 70-bp repeats-PUR-TK, <i>rmi1</i> ΔloxP/ΔloxP, <i>topo3α</i> ΔloxP/ΔloxP              |
| HSTB-201           | 2040-3HA(*)                                             | 2040-3HA::HYG                                                                                            |
| HSTB-210           | RMI1-3HA                                                | RMI1-3HA::PUR                                                                                            |
| HSTB-213           | TOPO3α-3MYC                                             | TOPO3α-3MYC::PHLEO                                                                                       |
| HSTB-218           | 2040-3HA(*) TOPO3α-3MYC                                 | 2040-3HA::HYG, TOPO3α-3MYC::PHLEO                                                                        |
| HSTB-222           | RMI1-3HA TOPO3α-3MYC                                    | RMI1-3HA::PUR, TOPO3α-3MYC::PHLEO                                                                        |

(\*) The full annotation is Tb927.8.2040.  
doi:10.1371/journal.pone.0025313.t002

**Table 3.** Plasmids used in this study.

| Names       | Inserts, targeting loci, and markers                     | Sources    |
|-------------|----------------------------------------------------------|------------|
| pHD309      | Vector to target at <i>TUB</i> array, HYG                |            |
| pLHTL-pyrFE | <i>TbURA3::HYG-TK</i>                                    | [64]       |
| pLEW100-Cre | Cre-recombinase in expression vector, PHLEO              | [64]       |
| pHJ17       | <i>loxP-HYG-TK-loxP</i>                                  | [39]       |
| pHJ18       | <i>loxP-PUR-TK-loxP</i>                                  | [39]       |
| pHJ23       | To target <i>BSD</i> downstream of ES promoter           | [39]       |
| pHJ63       | <i>TOPO3α Δ::loxP-PUR-TK-loxP</i>                        | [39]       |
| pHJ64       | <i>TOPO3α Δ::loxP-HYG-TK-loxP</i>                        | [39]       |
| pSY1        | <i>RAD51 Δ::HYG</i>                                      | [39]       |
| pSY23       | <i>RAD51 Δ::PHLEO</i>                                    | [39]       |
| pHJ71       | <i>RMI1 Δ::loxP-HYG-TK-loxP</i>                          | This study |
| pHJ77       | <i>RMI1 Δ::loxP-PUR-loxP</i>                             | This study |
| pSY38       | To insert wild-type <i>RMI1</i> at <i>TUB</i> array, HYG | This study |
| pMOTag53M   | One-step PCR-3xMYC tagging construct, PHLEO              | [42]       |
| pMOTag4H    | One-step PCR-3xHA tagging construct, HYG                 | [42]       |
| pMOTag2H    | One-step PCR-3xHA tagging construct, PUR                 | [42]       |

doi:10.1371/journal.pone.0025313.t003

In yeast, SGS1 is required for replisome stability, affecting the assembly of replication factors at the fork, in collaboration with checkpoint kinase MEC1 [62]. Therefore, TbRMI1-TOPO3α might be required for the stability of a newly formed replication fork between the active and a silent ES promoter region. If this is the case, generation of ES GC switching should require RAD51 and RMI1-TOPO3α functions. Alternatively, RMI1 might have novel function in the context of ES promoter, which may indirectly affect RAD51-dependent BIR. Transcription of ES occurs polycistronically with a *VSG* located ~ 50 kb downstream of the promoter, the only site where transcription machinery assembles within the unit. ES GC and *VSG* GC occur in different chromatin environments, so the mechanisms of these gene conversions could be fundamentally distinct.

The *rmi1* mutant was epistatic to *topo3α* in *VSG* switching phenotype. This genetic interaction is interesting because one would expect the opposite scenario considering that TOPO3α possesses enzymatic activity for resolution of recombination intermediates, which is stimulated by RMI1 [35,36]. The epistatic interaction of TbRMI1 and TbTOPO3α in *VSG* switching suggests that TbRMI1 may have a role, potentially with BLM helicase, in a process upstream of TbTOPO3α.

Given high level of sequence similarities between ESs, it is likely that silent ESs can recombine at a certain rate and yet the ES structures seem to be well maintained, suggesting that silent ES recombination may also be suppressed by protectors of genome integrity, and recombination of silent ESs might be elevated in *topo3α* or *rmi1* trypanosome mutants. It is difficult to examine recombination rates at or between silent ESs quantitatively, due to technical difficulties, such as strong gene silencing and sequence similarities.

It appears that trypanosomes suppress *VSG* GC effectively, although *VSG* switching is essential for parasite survival in the host and *VSG* GC is a dominant immune evasion mechanism. During host infection, parasite numbers rise and fall periodically. We think that recombination-mediated *VSG* switching is generally suppressed but one or two silent *VSG* loci may have a higher chance to recombine with the active ES, potentially due to their proximity. *VSG* loci might be highly recombinogenic without this suppression, which could increase the possibility for parasites to use up their expressible *VSGs* at the early stage of infection, consequently resulting in eradication by host immunity. To prevent this, parasites may expose their ES-linked *VSG* repertoire gradually to preserve the population survival by *VSG* switching and to prolong their infection, while having some time to accumulate novel *VSGs* at transcribable loci.

*VSG* switching requires key factors in recombination and replication and their interplay controls the outcome of *VSG* switches. Although it is beginning to reveal its mystery, the control mechanism of antigenic switching must involve various cellular processes, whose contributions are largely unknown. Additional factors as well as specific alleles of the RTR complex members should be studied thoroughly to understand mechanism of antigenic variation in depth.

## Materials and Methods

### Trypanosome strains and plasmids

*Trypanosoma brucei* bloodstream forms (strain Lister 427 antigenic type MITat1.2 clone 221a (expressing *VSG* 427-2)) were cultured in HMI-9 at 37°C. The cell lines constructed for this study are listed in Table 2. They are of ‘single marker (SM)’ background that expresses T7 RNA polymerase and Tet repressor [63]. Stable clones were obtained and maintained in HMI-9 media containing necessary antibiotics at the following concentrations, unless otherwise stated: 2.5 µg/ml, G418 (Sigma); 5 µg/ml, blasticidin (Invivogen); 5 µg/ml, hygromycin (Sigma); 0.1 µg/ml, puromycin (Sigma); 1 µg/ml, phleomycin (Invivogen). Plasmids used for this study are listed in Table 3.

### Construction of *Tbrmi1* knock-out lines

To generate *T. brucei* *mi1* mutants, HSTB-188, a wild-type ‘single marker’ line with the active ES marked with a blasticidin-resistance gene (*BSD*), was sequentially transfected with deletion cassettes. The cassettes contain either a hygromycin-resistance gene conjugated with a *Herpes simplex* virus thymidine kinase (*HYG-TK*) or a puromycin-resistance gene (*PUR*) flanked by homology sequences to upstream and downstream of Tb927.3.1830. Deletions were confirmed by PCR analyses. Single knock-out (sKO), *mi1*<sup>+/+</sup>, and double KO, *mi1*<sup>-/-</sup> were used to assess growth phenotypes, as described previously [39]. Selection markers flanked by loxP sites were removed by transiently expressing Cre-recombinase (pLew100-Cre). The cells that lost both *HYG-TK* and *PUR* were selected in 50 µg/ml ganciclovir (GCV). Loss of

markers was confirmed by resistance to puromycin and hygromycin, and by PCR analysis. The sequences of primers used here are available upon request. These cell lines were used for recombination and *VSG* switching assays.

### Co-immunoprecipitation and western blot

About 10<sup>8</sup> cells were lysed in lysis buffer (25 mM Tris-HCl (pH 7.5), 1 mM EDTA, 0.5% NP-40, 10% glycerol, 1 mM phenylmethylsulfonyl fluoride (PMSF), 1 mM dithiothreitol (DTT), protease inhibitor cocktails (Sigma)). Whole cell lysates were immunoprecipitated with rabbit anti-HA or anti-MYC antibodies. Immunoprecipitates were analyzed by western blot using mouse anti-HA or anti-MYC antibodies.

### *VSG* switching assay and analyses of switchers

To create switching reporter strains, the promoter and 70-bp repeats of the active ES were marked with *BSD* and *PUR-TK*, respectively, as described previously [39]. To determine *VSG* switching frequency and mechanisms, cells were maintained in the presence of blasticidin and puromycin to exclude switchers from the starting population. Cells were then allowed to switch in the absence of drug selection for 3 days. Indicated numbers of cells (Table 1) were suspended in HMI-9 media containing 5–10 µg/ml GCV and distributed in 96-well plates. GCV-resistant clones were examined for sensitivity to 2 µg/ml puromycin, to exclude non-switchers that carry spontaneous mutation(s) in *TK* but not in *PUR* gene. Non-switchers that carry mutations both in *PUR* and *TK* were ruled out by western blot analysis using anti-*VSG* 427-2 antibodies. Cloned switchers were analyzed for blasticidin sensitivity. Genomic DNA was analyzed by PCR for the presence of *BSD* and *VSG* 427-2. The sequences of primers used here are available upon request.

It is noted that all *VSG* switching assays in this study were performed without the MACS-enrichment step. MACS step may have reduced the number of some switchers, as ‘ES GC or ES loss’ switchers appear to have growth disadvantages, compared to parental cells and *VSG* GC switchers.

### Recombination assay

Gene-conversion frequency at *TbURA3* locus was determined as described previously [39].

### Acknowledgments

We thank Bibo Li and Nina Papavasiliou for comments on the manuscript, and members of Cross and Papavasiliou labs for useful discussions.

### Author Contributions

Conceived and designed the experiments: HK GAMC. Performed the experiments: HK. Analyzed the data: HK GAMC. Wrote the paper: HK GAMC.

## References

- Dalgaard JZ, Vengrova S (2004) Selective gene expression in multigene families from yeast to mammals. *Sci STKE* 2004: re17.
- Stavnezer J, Guikema JE, Schrader CE (2008) Mechanism and regulation of class switch recombination. *Annual review of immunology* 26: 261–292.
- Horn D, Barry JD (2005) The central roles of telomeres and subtelomeres in antigenic variation in African trypanosomes. *Chrom Res* 13: 525–533.
- Barry JD, McCulloch R (2001) Antigenic variation in trypanosomes: enhanced phenotypic variation in a eukaryotic parasite. In: Baker JR, Muller R, Rollinson D, eds. *Advances in Parasitology*. London: Academic Press Ltd. 49: 1–70.
- Duraisingh MT, Voss TS, Marty AJ, Duffy MF, Good RT, et al. (2005) Heterochromatin silencing and locus repositioning linked to regulation of virulence genes in *Plasmodium falciparum*. *Cell* 121: 13–24.
- Shykind BM, Rohani SC, O'Donnell S, Nemes A, Mendelsohn M, et al. (2004) Gene switching and the stability of odorant receptor gene choice. *Cell* 117: 801–815.
- Kratz E, Dugas JC, Ngai J (2002) Odorant receptor gene regulation: implications from genomic organization. *Trends Genet* 18: 29–34.
- Palenchar J, Bellofatto V (2006) Gene transcription in trypanosomes. *Mol Biochem Parasitol* 146: 135–141.

9. Gunzl A, Bruderer T, Laufer G, Schimanski B, Tu LC, et al. (2003) RNA polymerase I transcribes procyclin genes and variant surface glycoprotein gene expression sites in *Trypanosoma brucei*. *Eukaryot Cell* 2: 542–551.
10. Hertz-Fowler C, Figueiredo LM, Quail MA, Becker M, Jackson A, et al. (2008) Telomeric expression sites are highly conserved in *Trypanosoma brucei*. *PLoS ONE* 3: e3527.
11. Machado C, Augusto-Pinto L, McCulloch R, Teixeira S (2006) DNA metabolism and genetic diversity in Trypanosomes. *Mutat Res* 612: 40–57.
12. Cross GAM (2002) Antigenic variation in african trypanosomes and malaria. In: Marr J, Koumuniccki R, Nilsen TW, eds. *Mol Med Parasitol: Academic Press*. pp 89–110.
13. Pays E, Guyaux M, Aerts D, vanMeirvenne N, Steinert M (1985) Telomeric reciprocal recombination as a possible mechanism for antigenic variation in trypanosomes. *Nature* 316: 562–564.
14. Aitchison N, Talbot S, Shapiro J, Hughes K, Adkin C, et al. (2005) VSG switching in *Trypanosoma brucei*: antigenic variation analysed using RNAi in the absence of immune selection. *Mol Microbiol* 57: 1608–1622.
15. Rudenko G, McCulloch R, Dirksmulder A, Borst P (1996) Telomere exchange can be an important mechanism of variant surface glycoprotein gene switching in *Trypanosoma brucei*. *Mol Biochem Parasitol* 80: 65–75.
16. Bernards A, van der Ploeg LHT, Gibson WC, Leegwater P, Eijgenraam F, et al. (1986) Rapid change of the repertoire of variant surface glycoprotein genes in trypanosomes by gene duplication and deletion. *J Mol Biol* 190: 1–10.
17. Mankouri HW, Hickson ID (2007) The RecQ helicase-topoisomerase III-Rmi1 complex: a DNA structure-specific ‘dissolvasome’? *Trends Biochem Sci* 32: 538–546.
18. Yin J, Sobek A, Xu C, Meetei AR, Hoatlin M, et al. (2005) BLAP75, an essential component of Bloom’s syndrome protein complexes that maintain genome integrity. *EMBO J* 24: 1465–1476.
19. Chang M, Bellaoui M, Zhang C, Desai R, Morozov P, et al. (2005) RMI1/NCE4, a suppressor of genome instability, encodes a member of the RecQ helicase/Topo III complex. *EMBO J* 24: 2024–2033.
20. Chelysheva L, Vezon D, Belcrum K, Gendrot G, Grelon M (2008) The Arabidopsis BLAP75/Rmi1 Homologue Plays Crucial Roles in Meiotic Double-Strand Break Repair. *PLoS Genet* 4: e1000309.
21. Singh TR, Ali AM, Busygina V, Raynard S, Fan Q, et al. (2008) BLAP18/RMI2, a novel OB-fold-containing protein, is an essential component of the Bloom helicase-double Holliday junction dissolvasome. *Genes Dev* 22: 2856–2868.
22. Xu D, Guo R, Sobek A, Bachrati CZ, Yang J, et al. (2008) RMI, a new OB-fold complex essential for Bloom syndrome protein to maintain genome stability. *Genes Dev* 22: 2843–2855.
23. Mullen JR, Nallaseth FS, Lan YQ, Slagle CE, Brill SJ (2005) Yeast Rmi1/Nce4 controls genome stability as a subunit of the Sgs1-Top3 complex. *Mol Cell Biol* 25: 4476–4487.
24. Neff NF, Ellis NA, Ye TZ, Noonan J, Huang K, et al. (1999) The DNA helicase activity of BLM is necessary for the correction of the genomic instability of bloom syndrome cells. *Mol Biol Cell* 10: 665–676.
25. Ira G, Malkova A, Liberi G, Foiani M, Haber JE (2003) Srs2 and Sgs1-Top3 suppress crossovers during double-strand break repair in yeast. *Cell* 115: 401–411.
26. Bachrati CZ, Hickson ID (2008) RecQ helicases: guardian angels of the DNA replication fork. *Chromosoma* 117: 219–233.
27. Watt PM, Hickson ID, Borts RH, Louis EJ (1996) SGS1, a homologue of the Bloom’s and Werner’s syndrome genes, is required for maintenance of genome stability in *Saccharomyces cerevisiae*. *Genetics* 144: 935–945.
28. Wallis JW, Chretien G, Brodsky G, Rolfe M, Rothstein R (1989) A hyper-recombination mutation in *S. cerevisiae* identifies a novel eukaryotic topoisomerase. *Cell* 58: 409–419.
29. Wu L, Hickson ID (2003) The Bloom’s syndrome helicase suppresses crossing over during homologous recombination. *Nature* 426: 870–874.
30. Hartung F, Suer S, Knoll A, Wurz-Wildersinn R, Puchta H (2008) Topoisomerase 3alpha and RMI1 suppress somatic crossovers and are essential for resolution of meiotic recombination intermediates in *Arabidopsis thaliana*. *PLoS Genet* 4: e1000285.
31. Seki M, Nakagawa T, Seki T, Kato G, Tada S, et al. (2006) Bloom helicase and DNA topoisomerase IIIalpha are involved in the dissolution of sister chromatids. *Mol Cell Biol* 26: 6299–6307.
32. Gangloff S, McDonald JP, Bendixen C, Arthur L, Rothstein R (1994) The yeast type I topoisomerase Top3 interacts with Sgs1, a DNA helicase homolog: a potential eukaryotic reverse gyrase. *Mol Cell Biol* 14: 8391–8398.
33. Shor E, Gangloff S, Wagner M, Weinstein J, Price G, et al. (2002) Mutations in homologous recombination genes rescue top3 slow growth in *Saccharomyces cerevisiae*. *Genetics* 162: 647–662.
34. Mankouri HW, Hickson ID (2006) Top3 processes recombination intermediates and modulates checkpoint activity after DNA damage. *Mol Biol Cell* 17: 4473–4483.
35. Wu L, Bachrati CZ, Ou J, Xu C, Yin J, et al. (2006) BLAP75/RMI1 promotes the BLM-dependent dissolution of homologous recombination intermediates. *Proc Natl Acad Sci U S A* 103: 4068–4073.
36. Bussen W, Raynard S, Busygina V, Singh AK, Sung P (2007) Holliday junction processing activity of the BLM-Topo IIIalpha-BLAP75 complex. *J Biol Chem* 282: 31484–31492.
37. Chen CF, Brill SJ (2007) Binding and activation of DNA topoisomerase III by the Rmi1 subunit. *J Biol Chem* 282: 28971–28979.
38. Raynard S, Zhao W, Bussen W, Lu L, Ding YY, et al. (2008) Functional role of BLAP75 in BLM-topoisomerase IIIalpha-dependent holliday junction processing. *J Biol Chem* 283: 15701–15708.
39. Kim HS, Cross GA (2010) TOPO3alpha influences antigenic variation by monitoring expression-site-associated VSG switching in *Trypanosoma brucei*. *PLoS Pathog* 6: e1000992.
40. Wang F, Yang Y, Singh TR, Busygina V, Guo R, et al. (2010) Crystal structures of RMI1 and RMI2, two OB-fold regulatory subunits of the BLM complex. *Structure* 18: 1159–1170.
41. Hoadley KA, Xu D, Xue Y, Satyshur KA, Wang W, et al. (2010) Structure and cellular roles of the RMI core complex from the bloom syndrome dissolvasome. *Structure* 18: 1149–1158.
42. Oberholzer M, Morand S, Kunz S, Seebeck T (2006) A vector series for rapid PCR-mediated C-terminal in situ tagging of *Trypanosoma brucei* genes. *Mol Biochem Parasitol* 145: 117–120.
43. Seki M, Tada S, Enomoto T (2006) Function of recQ family helicase in genome stability. *Subcell Biochem* 40: 49–73.
44. Sung P, Klein H (2006) Mechanism of homologous recombination: mediators and helicases take on regulatory functions. *Nat Rev Mol Cell Biol* 7: 739–750.
45. Cross M, Taylor MC, Borst P (1998) Frequent loss of the active site during variant surface glycoprotein expression site switching in vitro in *Trypanosoma brucei*. *Mol Cell Biol* 18: 198–205.
46. Boothroyd CE, Dreesen O, Leonova T, Ly KI, Figueiredo LM, et al. (2009) A yeast-endonuclease-generated DNA break induces antigenic switching in *Trypanosoma brucei*. *Nature* 459: 278–281.
47. Sfeir A, Kosiyatrakul ST, Hockemeyer D, MacRae SL, Karlseder J, et al. (2009) Mammalian telomeres resemble fragile sites and require TRF1 for efficient replication. *Cell* 138: 90–103.
48. Liberi G, Maffioletti G, Lucca C, Chiolo I, Baryshnikova A, et al. (2005) Rad51-dependent DNA structures accumulate at damaged replication forks in sgs1 mutants defective in the yeast ortholog of BLM RecQ helicase. *Genes Dev* 19: 339–350.
49. Lee JY, Kozak M, Martin JD, Penneck E, Johnson FB (2007) Evidence that a RecQ helicase slows senescence by resolving recombining telomeres. *PLoS Biol* 5: e160.
50. Cejka P, Cannavo E, Polaczek P, Masuda-Sasa T, Pokharel S, et al. (2010) DNA end resection by Dna2-Sgs1-RPA and its stimulation by Top3-Rmi1 and Mre11-Rad50-Xrs2. *Nature* 467: 112–116.
51. Mimitou EP, Symington LS (2008) Sae2, Exo1 and Sgs1 collaborate in DNA double-strand break processing. *Nature* 455: 770–774.
52. Marrero VA, Symington LS (2010) Extensive DNA end processing by exo1 and sgs1 inhibits break-induced replication. *PLoS Genet* 6: e1001007.
53. Bernstein KA, Shor E, Sunjevaric I, Fumasoni M, Burgess RC, et al. (2009) Sgs1 function in the repair of DNA replication intermediates is separable from its role in homologous recombinational repair. *EMBO J* 28: 915–925.
54. Bai Y, Symington L (1996) A Rad52 homolog is required for *RAD51*-independent mitotic recombination in *Saccharomyces cerevisiae*. *Genes Dev* 10: 2025–2037.
55. Malkova A, Ivanov EL, Haber JE (1996) Double-strand break repair in the absence of rad51 in yeast: a possible role for break-induced DNA replication. *Proc Natl Acad Sci U S A* 93: 7131–7136.
56. Conway C, Proudfoot C, Burton P, Barry JD, McCulloch R (2002) Two pathways of homologous recombination in *Trypanosoma brucei*. *Mol Microbiol* 45: 1687–1700.
57. Le S, Moore JK, Haber JE, Greider CW (1999) RAD50 and RAD51 define two pathways that collaborate to maintain telomeres in the absence of telomerase. *Genetics* 152: 143–152.
58. Lydeard JR, Jain S, Yamaguchi M, Haber JE (2007) Break-induced replication and telomerase-independent telomere maintenance require Pol32. *Nature* 448: 820–823.
59. Teng SC, Chang J, McCowan B, Zakian VA (2000) Telomerase-independent lengthening of yeast telomeres occurs by an abrupt Rad50p-dependent, Rif-inhibited recombinational process. *Mol Cell* 6: 947–952.
60. Smith CE, Llorente B, Symington LS (2007) Template switching during break-induced replication. *Nature* 447: 102–105.
61. Llorente B, Smith CE, Symington LS (2008) Break-induced replication: what is it and what is it for? *Cell cycle* 7: 859–864.
62. Cobb JA, Schleker T, Rojas V, Bjergbaek L, Tercero JA, et al. (2005) Replisome instability, fork collapse, and gross chromosomal rearrangements arise synergistically from Mec1 kinase and RecQ helicase mutations. *Genes Dev* 19: 3055–3069.
63. Wirtz E, Leal S, Ochatt C, Cross GAM (1999) A tightly regulated inducible expression system for dominant negative approaches in *Trypanosoma brucei*. *Mol Biochem Parasitol* 99: 89–101.
64. Scahill MD, Pastar I, Cross GA (2008) CRE recombinase-based positive-negative selection systems for genetic manipulation in *Trypanosoma brucei*. *Mol Biochem Parasitol* 157: 73–82.
